# Supplementary material for: No Sex Differences in Self-Reported Childhood Maltreatment in Major Depressive and Bipolar Disorders: A Retrospective Study
Source: MDPI journal article supplement (doi:10.3390/brainsci12060804), 2022-06-19
Supplement: s1 [file s1]

Table S1. Descriptive statistics and comparisons of the two entire samples

| Characteristics*                                         | Patients with MDD<br>(N= 335) |      | Patients with BD<br>(N= 168) |      | T-Test <sup>§</sup> / Fisher's exact <sup>†</sup> /Mann-Whitney (W) | p-value |
|----------------------------------------------------------|-------------------------------|------|------------------------------|------|---------------------------------------------------------------------|---------|
|                                                          | Mean/N                        | SD/% | Mean/N                       | SD/% |                                                                     |         |
| Age, years                                               | 64.2                          | 11.9 | 61.8                         | 12.9 | 2.0 <sup>§</sup>                                                    | 0.05    |
| Age, range                                               | 28-89                         |      | 29-90                        |      |                                                                     |         |
| Sex, women                                               | 255                           | 76%  | 97                           | 58%  | — <sup>†</sup>                                                      | <.001   |
| Education, years                                         | 10.6                          | 4.2  | 11.3                         | 3.7  | 1.8 <sup>§</sup>                                                    | 0.08    |
| Clinical Global Impression Scale-Severity (CGI-S)        | 3.4                           | 0.8  | 3.6                          | 0.8  | -2.2 <sup>§</sup>                                                   | 0.03    |
| History of psychiatric disorders other than MDD/BD (yes) | 139                           | 41%  | 55                           | 33%  | — <sup>†</sup>                                                      | 0.07    |
| Childhood Trauma Questionnaire (CTQ)                     |                               |      |                              |      |                                                                     |         |
| Scores                                                   |                               |      |                              |      |                                                                     |         |
| Sexual abuse                                             | 6.5                           | 3.5  | 6.3                          | 3.0  | 0.5 <sup>§</sup>                                                    | 0.61    |
| Physical abuse                                           | 6.7                           | 3.7  | 6.4                          | 3.0  | 0.9 <sup>§</sup>                                                    | 0.36    |
| Emotional abuse                                          | 8.6                           | 4.8  | 8.6                          | 4.7  | -0.0 <sup>§</sup>                                                   | 0.97    |
| Physical neglect                                         | 8.0                           | 3.3  | 7.5                          | 3.1  | 1.6 <sup>§</sup>                                                    | 0.11    |
| Emotional neglect                                        | 13.5                          | 6.0  | 12.2                         | 5.3  | 2.4 <sup>§</sup>                                                    | 0.02    |
| Total score                                              | 43.1                          | 16.8 | 40.9                         | 14.7 | 1.5 <sup>§</sup>                                                    | 0.13    |
| Number of CTs to which patients had been exposed**       | 2.0                           | 1.4  | 1.9                          | 1.5  | 0.7 <sup>§</sup>                                                    | 0.48    |
| Classification***                                        |                               |      |                              |      |                                                                     |         |
| Sexual abuse (SA)                                        |                               |      |                              |      |                                                                     |         |
| None or Minimal (SA subscale score= 5)                   | 285                           | 85%  | 142                          | 85%  |                                                                     |         |
| Low to Moderate (SA subscale score= 6-7)                 | 28                            | 8%   | 15                           | 9%   |                                                                     |         |
| Moderate to Severe (SA subscale score= 8-12)             | 7                             | 2%   | 7                            | 4%   |                                                                     |         |
| Severe to Extreme (SA subscale score≥13)                 | 15                            | 4%   | 4                            | 2%   | 28034.5                                                             | 0.91    |
| Physical abuse (PA)                                      |                               |      |                              |      |                                                                     |         |
| None or Minimal (PA subscale score= 5-7)                 | 275                           | 82%  | 137                          | 82%  |                                                                     |         |
| Low to Moderate (PA subscale score= 8-9)                 | 17                            | 5%   | 14                           | 8%   |                                                                     |         |
| Moderate to Severe (PA subscale score= 10-12)            | 17                            | 5%   | 8                            | 5%   |                                                                     |         |
| Severe to Extreme (PA subscale score≥13)                 | 26                            | 8%   | 9                            | 5%   | 28171.5                                                             | 0.98    |
| Emotional abuse (EA)                                     |                               |      |                              |      |                                                                     |         |
| None or Minimal (EA subscale score= 5-8)                 | 141                           | 42%  | 67                           | 40%  |                                                                     |         |

|                                                                                                    |     |     |     |     |                |      |
|----------------------------------------------------------------------------------------------------|-----|-----|-----|-----|----------------|------|
| Low to Moderate (EA subscale score= 9-12)                                                          | 56  | 17% | 28  | 17% |                |      |
| Moderate to Severe (EA subscale score= 13-15)                                                      | 81  | 24% | 44  | 26% |                |      |
| Severe to Extreme (EA subscale score≥16)                                                           | 57  | 17% | 29  | 17% | 27486          | 0.65 |
| <b><i>Physical neglect (PN)</i></b>                                                                |     |     |     |     |                |      |
| None or Minimal (PN subscale score= 5-7)                                                           | 195 | 58% | 110 | 65% |                |      |
| Low to Moderate (PN subscale score= 8-9)                                                           | 63  | 19% | 25  | 15% |                |      |
| Moderate to Severe (PN subscale score= 10-12)                                                      | 41  | 12% | 19  | 11% |                |      |
| Severe to Extreme (PN subscale score≥13)                                                           | 36  | 11% | 14  | 8%  | 30163          | 0.13 |
| <b><i>Emotional neglect (EN)</i></b>                                                               |     |     |     |     |                |      |
| None or Minimal (EN subscale score= 5-9)                                                           | 96  | 29% | 58  | 35% |                |      |
| Low to Moderate (EN subscale score= 10-14)                                                         | 99  | 30% | 59  | 35% |                |      |
| Moderate to Severe (EN subscale score= 15-17)                                                      | 47  | 14% | 21  | 13% |                |      |
| Severe to Extreme (EN subscale score≥18)                                                           | 93  | 28% | 30  | 18% | 31668          | 0.02 |
| <b>Patients with at least one type of CT classified as Low to Moderate</b>                         | 281 | 84% | 135 | 80% | — <sup>+</sup> | 0.32 |
| <b>Patients with at least one type of CT classified as Moderate to Severe or Severe to Extreme</b> | 195 | 58% | 90  | 54% | — <sup>+</sup> | 0.34 |
| <b>Minimization/denial</b>                                                                         |     |     |     |     |                |      |
| No items scored 1                                                                                  | 238 | 71% | 121 | 72% |                |      |
| One item scored 1                                                                                  | 62  | 19% | 25  | 15% |                |      |
| Two items scored 1                                                                                 | 21  | 6%  | 15  | 9%  |                |      |
| Three items scored 1                                                                               | 14  | 4%  | 7   | 4%  |                |      |
| At least one item scored 1                                                                         | 97  | 29% | 47  | 28% | 28202.5        | 0.96 |

\*The "Characteristics" are expressed as number (N) and % or mean and standard deviation (SD): the characteristics expressed as mean and SD are *italicized*; BD: bipolar disorder; CT(s): childhood trauma(s); MDD: major depressive disorder; \*\*the number of sub-scales in which the Cut Scores identified at least a low (to moderate) level of trauma; \*\*\*For each type of childhood trauma, the classification of exposure severity is based on the Cut Scores of each subscale reported in the brackets; p-values considered significant (i.e. <0.01) are **bolded**
